# Supplementary material
Source: publisher figshare collection journal article supplement (https://acs.figshare.com/ndownloader/files/4002286)
Supplement: Supplementary file 1 [file 4002286]

## **Supporting information**

**Gadolinium complex of DO3A-benzothiazole aniline (BTA)**

**conjugate as a theranostic agent**

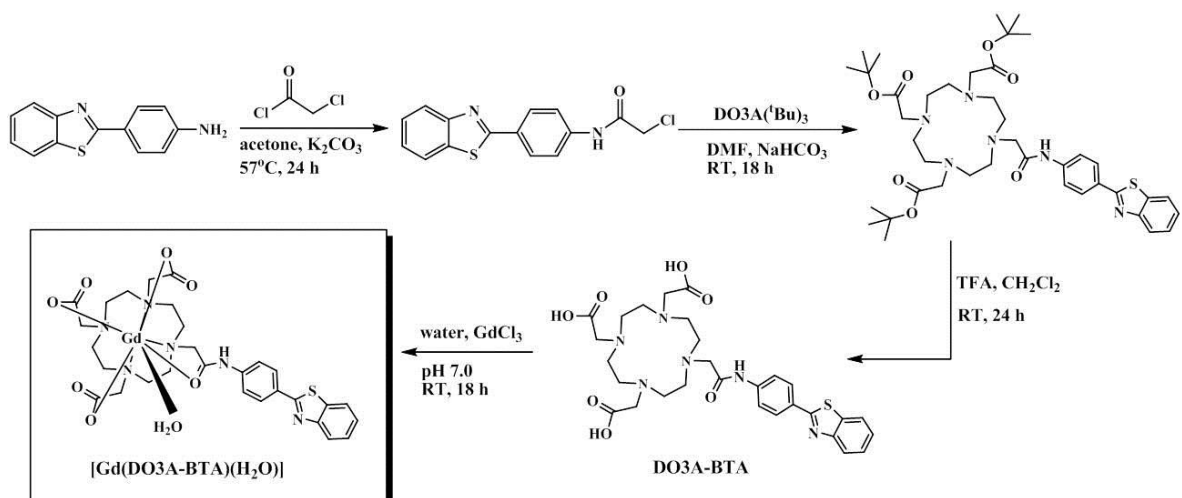

**Scheme S1**

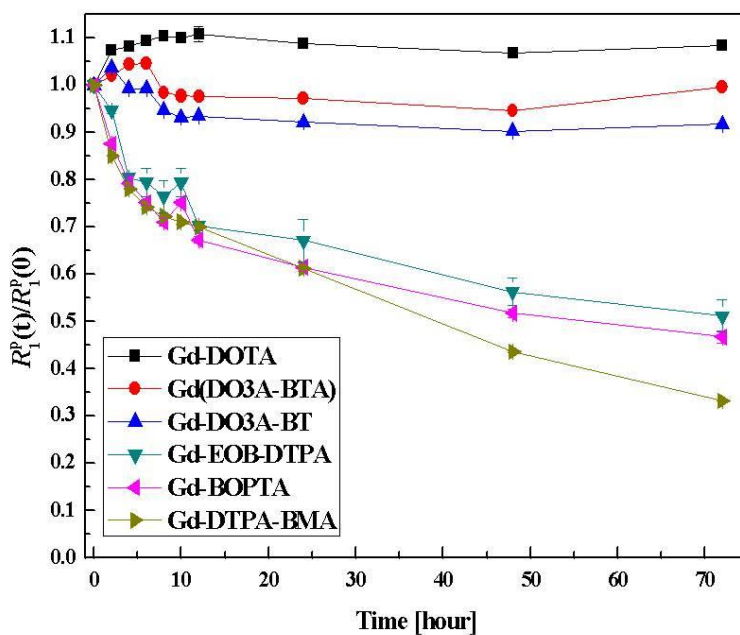

**Figure S1.** Evolution of longitudinal relaxation rates  $R_1^P(t)/R_1^P(0)$  as a function of time for various MRI CAs ( $[\text{Gd}]_0$  and  $[\text{ZnCl}_2]_0 = 2.5\text{ mM}$  in PBS (pH 7.4) at 128 MHz and 293 K).

## Determination of Binding constants

The binding constants of various CAs with HSA was measured according to the literature method.<sup>1</sup> The non-linear increase of the proton paramagnetic relaxation rate measured at 64 MHz on solutions containing 0.64 mM HSA and various concentrations of CAs (0-6 mM). The proton data obtained in HSA solution were fitted using Equation S1, where  $K_a$  is the binding constant characterizing the interaction with HSA,  $p^0$  is the HSA concentration,  $s^0$  is the concentration of the paramagnetic complex, N is the number of independent interaction sites (N was set to 1), and  $r_1^c$  and  $r_1^f$  are the relaxivities of the complex HSA-constant agent and of the free constant agent, respectively.

$$R_1^{p^{Obs}} = 1000 \times \left\{ \left( r_1^f \times s^0 \right) + \frac{1}{2} \left( r_1^c - r_1^f \right) \left( \left( N \times p^0 \right) + s^0 + K_a^{-1} - \sqrt{\left( \left( N \times p^0 \right) + s^0 + K_a^{-1} \right)^2 - 4 \times N \times s^0 \times p^0} \right) \right\}$$

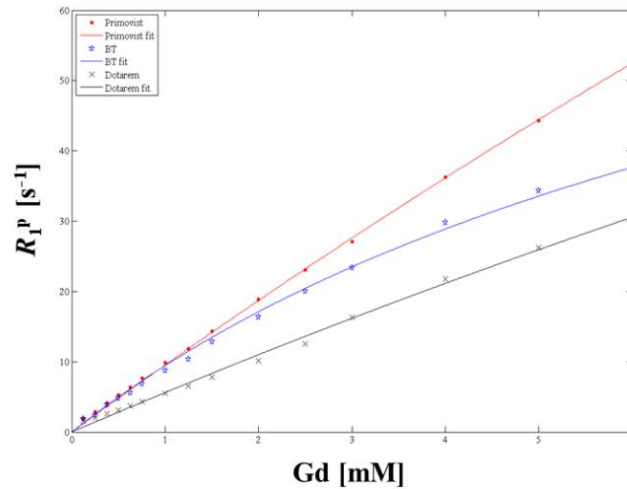

**Figure S2.** Proton longitudinal paramagnetic relaxation rates of [Gd(DO3A-BTA)(H<sub>2</sub>O)], Gd-EOB-DTPA and Gd-DOTA as a function of [Gd] in PBS (pH 7.4) solutions of HSA (0.67 mM) at 64 MHz and 293 K.

**Table S1.** Binding constants of variable CAs with HSA

|              | $K_a[M^{-1}]$ |
|--------------|---------------|
| Gd(DO3A-BTA) | 160           |
| Gd-DOTA      | 21            |
| Gd-EOB-DTPA  | 27            |

**Table S2.** Relaxivity data of Gd-DOTA and Gd(DO3A-BTA) with HSA 0.67 mM in PBS (64MHz, 293K)

|              | $r_1(\text{mM}^{-1}\text{s}^{-1})$ | $r_2(\text{mM}^{-1}\text{s}^{-1})$ |
|--------------|------------------------------------|------------------------------------|
| Gd(DO3A-BTA) | $7.83 \pm 0.05$                    | $11.34 \pm 0.92$                   |
| Gd-DOTA      | $4.33 \pm 0.03$                    | $4.08 \pm 0.27$                    |
| Gd-EOB-DTPA  | $8.52 \pm$                         | $11.18 \pm$                        |

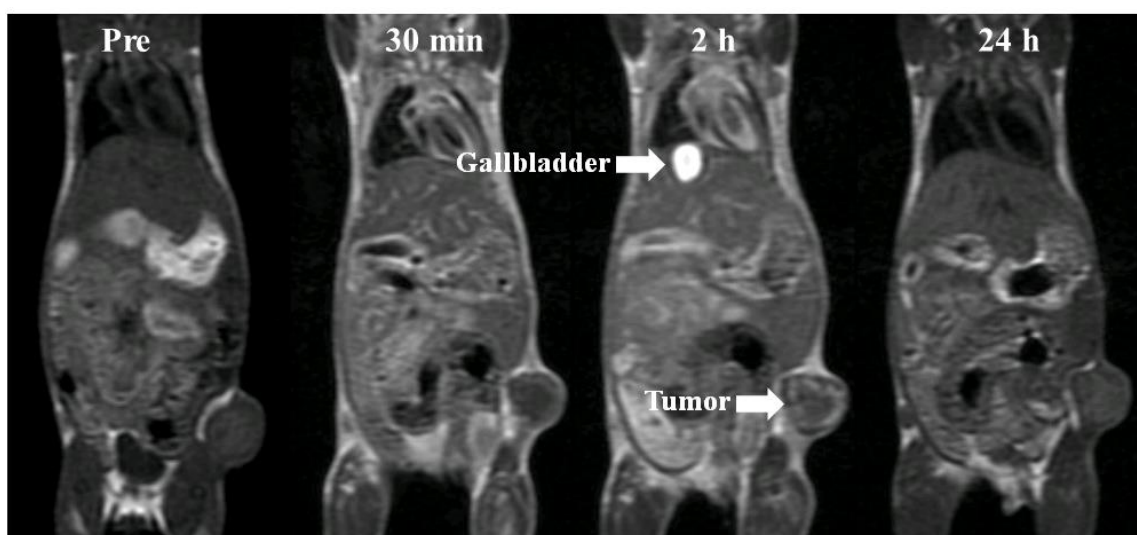

**Figure S3.** *In vivo*  $T_1$  weighted MR coronal images of mice obtained by tail vein injection with Gd(DO3A-BTA) (0.1 mmol/kg).

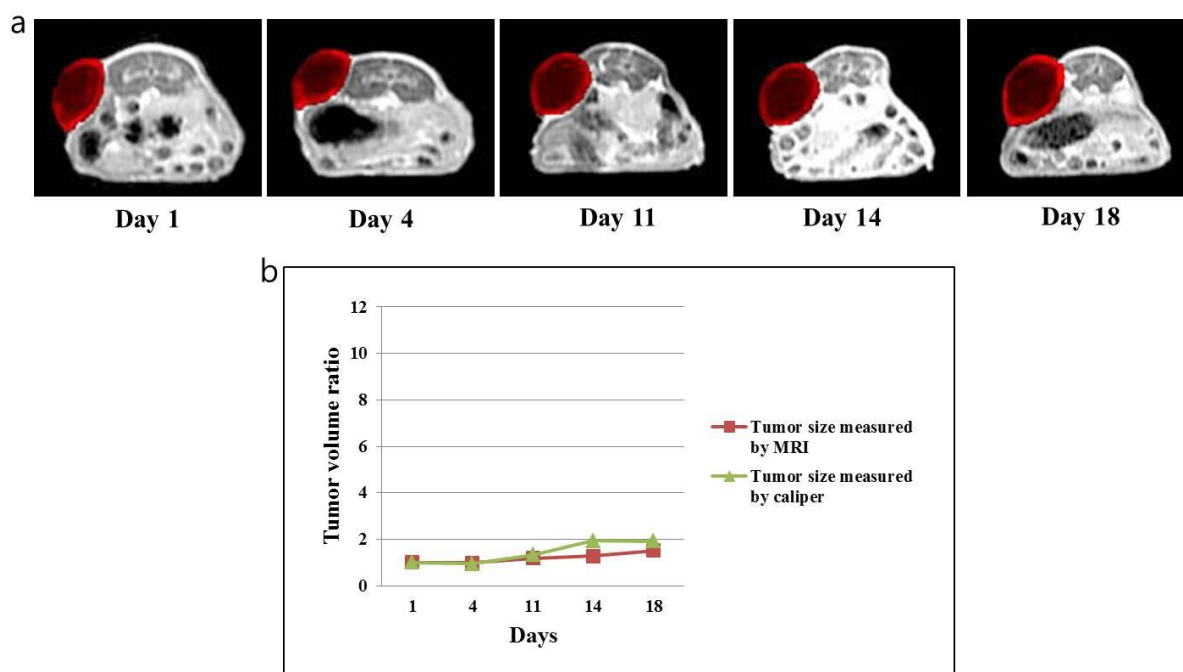

**Figure S4.** (a) MR monitoring of tumor size (days 1 to 18). (b) Tumor volume ratios measured by MRI (red square) and a caliper (green triangle). Mice were injected each day with a new dose of Gd(DO3A-BT) at 0.1 mmol/kg.

**Table S3.** Gd concentration in tumors as a function of time

|                                                            | 1 h   | 6 h    | 24 h  |
|------------------------------------------------------------|-------|--------|-------|
| Gd concentration in tumors<br>( $\mu\text{g Gd/g tumor}$ ) | 40.41 | 221.02 | 55.78 |

**Table S4.** Amounts of Gd in cell fractions ( $\mu\text{g}/\text{cell}$  fractions) in  $2 \times 10^5$  cells

|            | Nucleus | Cytosol | Membrane |
|------------|---------|---------|----------|
| SK-HEP-1   | 2.55    | 5.40    | 0.93     |
| MCF-7      | 9.66    | 18.35   | 1.19     |
| MDA-MB-231 | 2.21    | 11.98   | 0.74     |

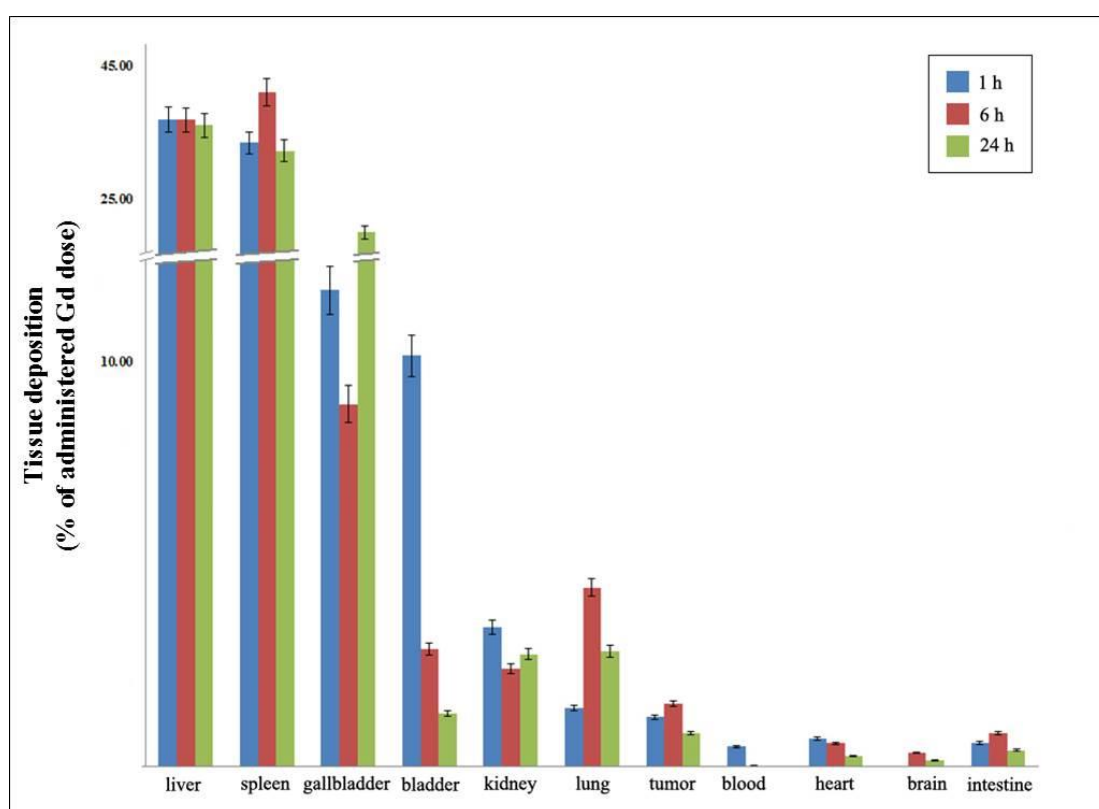

**Figure S5.** Biodistribution of Gd(DO3A-BTA) (0.1 mmol Gd/kg body weight) in balb/c nude mice bearing MDA-MB-231 tumor. Groups of mice ( $n = 5$ ) were sacrificed at 1, 6 and 24 h.

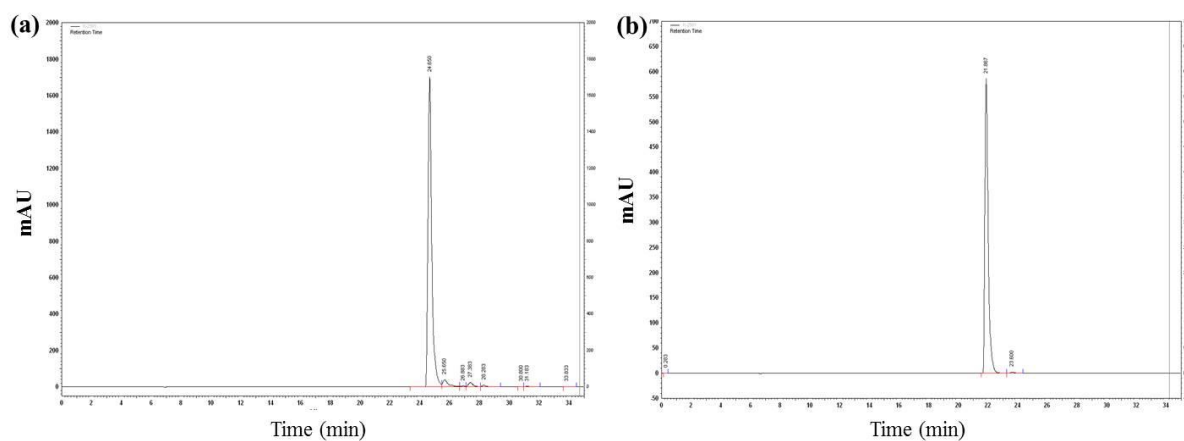

**Figure S6.** HPLC spectra of (a) DO3A-BT and (b) Gd(DO3A-BT)

## References

- (1) Muller, R. N.; Raduchel, B.; Laurent, S.; Platzek, J.; Pierart, C.; Mareski, P.; Vander Elst, L. Physicochemical characterization of MS-325, a new gadolinium complex, by multinuclear relaxometry. *Eur. J. Inorg. Chem.* **1999**, 1949-1955.
